# Supplementary material
Source: PubMed Central journal article supplement (PMC137925)
Supplement: pnas_212522099_3.pdf [file pnas_212522099_3.pdf]

Table 3. Genistein and flavonol levels in individual progeny of transgenic *Arabidopsis* expressing soybean IFS and/or alfalfa CHI\*

| Line          | Generation     | Alfalfa CHI activity, nmol/min/mg | Quercetin, nmol/g FW | Kaempferol, nmol/g FW | Total flavonols, nmol/g FW | Genistein, nmol/g FW |
|---------------|----------------|-----------------------------------|----------------------|-----------------------|----------------------------|----------------------|
| Wild-type     | T <sub>4</sub> | 0                                 | 32.4±5.9             | 285.8±35.7            | 318.2±36.7                 | 0                    |
| CHI 4-11      | T <sub>4</sub> | 49.6±3.0                          | 79.6±16.4            | 475.3±77.8            | 555.0±84.5                 | 0                    |
| IFS 15b       | T <sub>4</sub> | 0                                 | 29.4±7.3             | 162.7±37.4            | 192.1±43.9                 | 11.9±1.9             |
| IFS/CHI-1     | F <sub>2</sub> | ND <sup>†</sup>                   | 77.1±11.2            | 247.9±60.5            | 325.0±70.7                 | 43.9±1.3             |
| IFS/CHI-2     | F <sub>2</sub> | ND                                | 23.0±9.1             | 216.5±50.8            | 239.5±56.4                 | 9.6±3.1              |
| IFS/CHI-3     | F <sub>2</sub> | ND                                | 89.7±8.4             | 503.6±48.8            | 593.3±57.2                 | 9.0±1.8              |
| IFS/CHI 3-2-1 | F <sub>3</sub> | 38.8±2.3                          | 65.4±5.8             | 334.9±21.9            | 400.3±27.6                 | 11.3±2.7             |
| IFS/CHI 3-2-2 | F <sub>3</sub> | 42.6±1.9                          | 38.2±6.2             | 297.0±7.4             | 335.2±13.2                 | 10.7±1.5             |
| IFS/CHI 3-2-3 | F <sub>3</sub> | 35.2±1.7                          | 12.8±5.2             | 67.9±6.8              | 80.7±1.7                   | 5.7±1.2              |
| IFS/CHI 3-3-1 | F <sub>3</sub> | 0                                 | 35.9±3.6             | 81.4±9.6              | 117.2±12.5                 | 19.4±2.4             |
| IFS/CHI 3-4-1 | F <sub>3</sub> | 0                                 | 21.4±4.1             | 75.0±11.9             | 96.4±11.3                  | 17.6±0.4             |
| IFS/CHI 3-4-2 | F <sub>3</sub> | 46.5±1.0                          | 40.7±4.3             | 205.3±17.5            | 246.0±21.7                 | 16.4±0.3             |
| IFS/CHI 3-4-3 | F <sub>3</sub> | 52.6±1.6                          | 49.9±7.1             | 311.5±9.1             | 361.4±13.3                 | 13.5±2.5             |
| IFS/CHI 3-4-4 | F <sub>3</sub> | 43.8±0.6                          | 31.4±2.6             | 251.0±6.4             | 282.4±7.8                  | 8.2±1.6              |
| IFS/CHI 3-5-1 | F <sub>3</sub> | 63.6±1.3                          | 77.3±8.4             | 672.3±8.6             | 749.6±17                   | 7.0±0.8              |

\*Plants were grown under 12-h light/12-h dark, ~150 μE light intensity, for 35 days. Data for T<sub>4</sub> plants are means ± SE from at least five replicate plants with 2-3 independent analyses for each plant. Data for individual F<sub>2</sub> and F<sub>3</sub> progeny represent triplicate analyses.

<sup>†</sup>Not determined
