# Supplementary material
Source: PubMed Central journal article supplement (PMC137925)
Supplement: pnas_212522099_4.pdf [file pnas_212522099_4.pdf]

Table 4. Genistein, flavonol, and anthocyanin levels in individual progeny of transgenic *Arabidopsis* expressing soybean IFS, alfalfa CHI, and over-expressing PAP1\*

| Line              | Generation       | Quercetin,<br>nmol/g FW | Kaempferol,<br>nmol/g FW | Total flavonols,<br>nmol/g FW | Anthocyanins,<br>mAu/g FW <sup>†</sup> | Genistein,<br>nmol/g FW |
|-------------------|------------------|-------------------------|--------------------------|-------------------------------|----------------------------------------|-------------------------|
| Wild-type control | >T <sub>3</sub>  | 21.0 ± 5.7              | 418.9 ± 33.3             | 439.9 ± 30.9                  | 3.1 ± 0.4                              | 0                       |
| Pap1-D            | >T <sub>3</sub>  | 200.0 ± 8.3             | 345.5 ± 48.3             | 545.7 ± 40.3                  | 192.0 ± 7.1                            | 0                       |
| CHI/Pap1-D (3-26) | > T <sub>3</sub> | 89.3 ± 6.1              | 666.6 ± 103.0            | 755.9 ± 103.7                 | 131.1 ± 10.6                           | 0                       |
| IFS 6E            | > T <sub>3</sub> | 20.8 ± 6.6              | 323.5 ± 4.3              | 344.3 ± 9.5                   | 1.1 ± 0.2                              | 3.5 ± 0.2               |
| 3-26/6E:          |                  |                         |                          |                               |                                        |                         |
| 1-1               | F <sub>2</sub>   | 68.0 ± 3.9              | 1507.2 ± 35.7            | 1575.2 ± 33.1                 | 34.7 ± 11.1                            | 5.1 ± 1.3               |
| 1-2               | F <sub>2</sub>   | 152.3 ± 17.5            | 1242.4 ± 95.8            | 1394.8 ± 112.4                | 60.2 ± 4.6                             | 7.6 ± 0.7               |
| 4-2               | F <sub>2</sub>   | 57.3 ± 18.8             | 921.0 ± 23.0             | 978.3 ± 9.3                   | 23.9 ± 3.1                             | 2.3 ± 1.0               |
| 6-1               | F <sub>2</sub>   | 52.0 ± 13.0             | 797.1 ± 92.0             | 849.1 ± 80.3                  | 18.2 ± 1.1                             | 3.2 ± 1.0               |
| 6-2               | F <sub>2</sub>   | 34.4 ± 6.7              | 681.2 ± 22.0             | 715.6 ± 28.4                  | 16.5 ± 2.8                             | 5.8 ± 0.3               |

\*Plants were grown under 12-h light/12-h dark, ~200 µE light intensity. Data for >T<sub>3</sub> plants are mean ± SE from three replicate plants each assayed in triplicate. Data for individual F<sub>2</sub> lines are from triplicate analyses.

<sup>†</sup>UV absorbance at 510 nm
